# Supplementary material for: High pressure micromechanical force measurements of the effects of surface corrosion and salinity on CH4/C2H6 hydrate particle–surface interactions
Source: Royal Society of Chemistry journal article supplement (doi:10.1039/c7cp01584d), 2017-01-01
Supplement: c7cp01584d1.pdf [file c7cp01584d1.pdf]

## Supporting Information

For

### High Pressure Micromechanical Force Measurements of the Effects of Surface Corrosion and Salinity on CH<sub>4</sub>/C<sub>2</sub>H<sub>6</sub> Hydrate Particle- Surface Interactions

Shenglong Wang<sup>1,2</sup>, Sijia Hu<sup>1</sup>, Erika P. Brown<sup>1,3</sup>, Matthew A. Nakatsuka<sup>3</sup>, Jiafei Zhao<sup>2</sup>, Mingjun

Yang<sup>2</sup>, Yongchen Song<sup>2</sup>, Carolyn A. Koh<sup>1,\*</sup>

1. Center for Hydrate Research, Colorado School of Mines, Golden, CO, 80401, USA

2. School of Energy and Power Engineering, Dalian University of Technology, Dalian, Liaoning,  
116024, China

3. Oceanit Laboratories, Inc., Honolulu, Hawaii, 96813, USA

\*Corresponding Author: ckoh@mines.edu

#### Table of Contents:

**Figure S1.** Cohesion force measurements without NaCl (Baseline).

**Figure S2.** Cohesion forces of CH<sub>4</sub>/C<sub>2</sub>H<sub>6</sub> hydrate particles with 1.0 wt.% NaCl

**Figure S3.** Cohesion forces of CH<sub>4</sub>/C<sub>2</sub>H<sub>6</sub> hydrate particles with 3.5 wt.% NaCl

**Figure S4.** Cohesion forces of CH<sub>4</sub>/C<sub>2</sub>H<sub>6</sub> hydrate particles with 5.0 wt.% NaCl

**Figure S5.** Hydrate film morphologies on corroded surfaces with different soak time  
in 5 wt.% NaCl solution

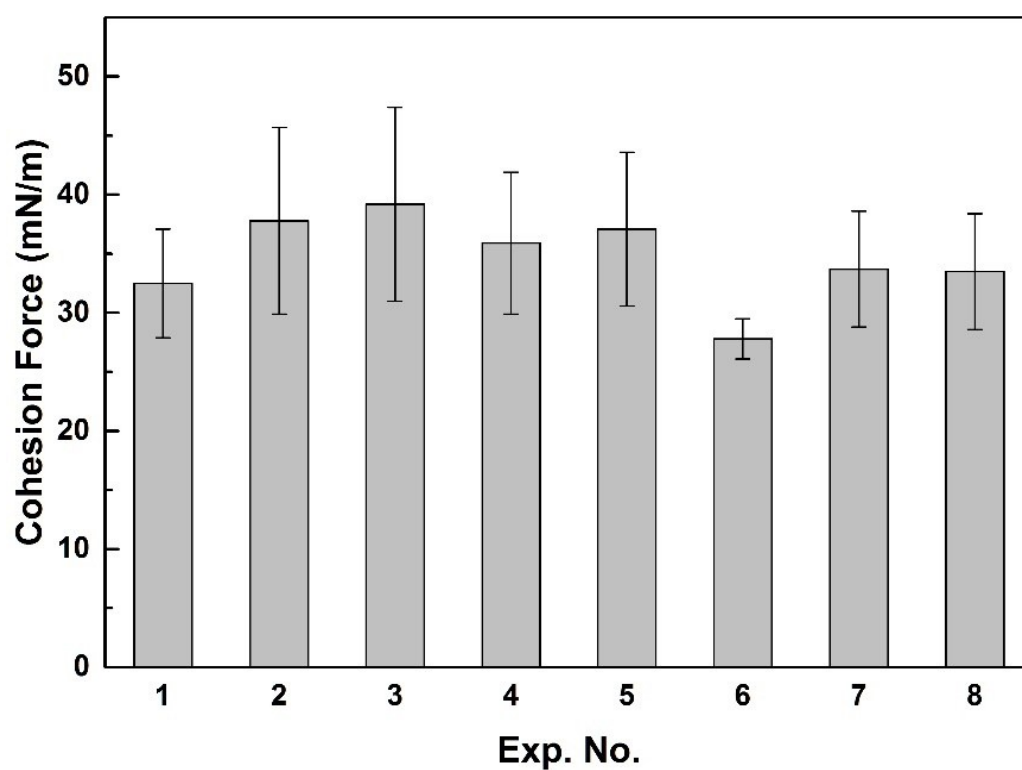

**Figure S1.** Cohesion force measurements without NaCl (Baseline). 8 individual experiments in total and each experiment involves at least 40 Individual pull-off repeat experiments.

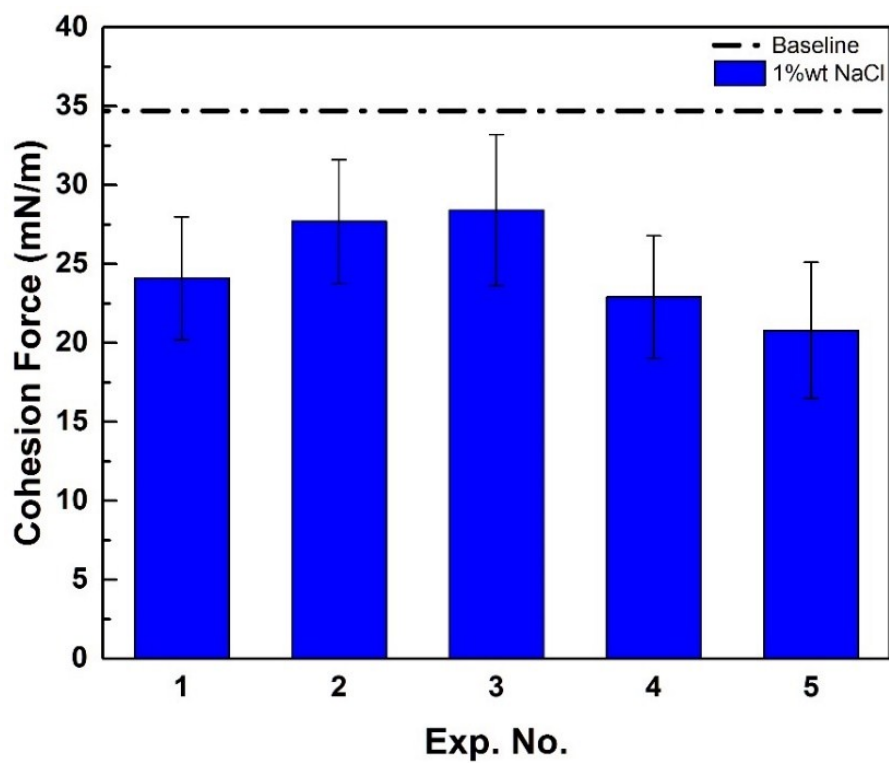

**Figure S2.** Cohesion forces of CH<sub>4</sub>/C<sub>2</sub>H<sub>6</sub> hydrate particles with 1.0 wt.% NaCl. 5 individual experiments in total and each experiment involves at least 40 Individual pull-off repeat experiments.

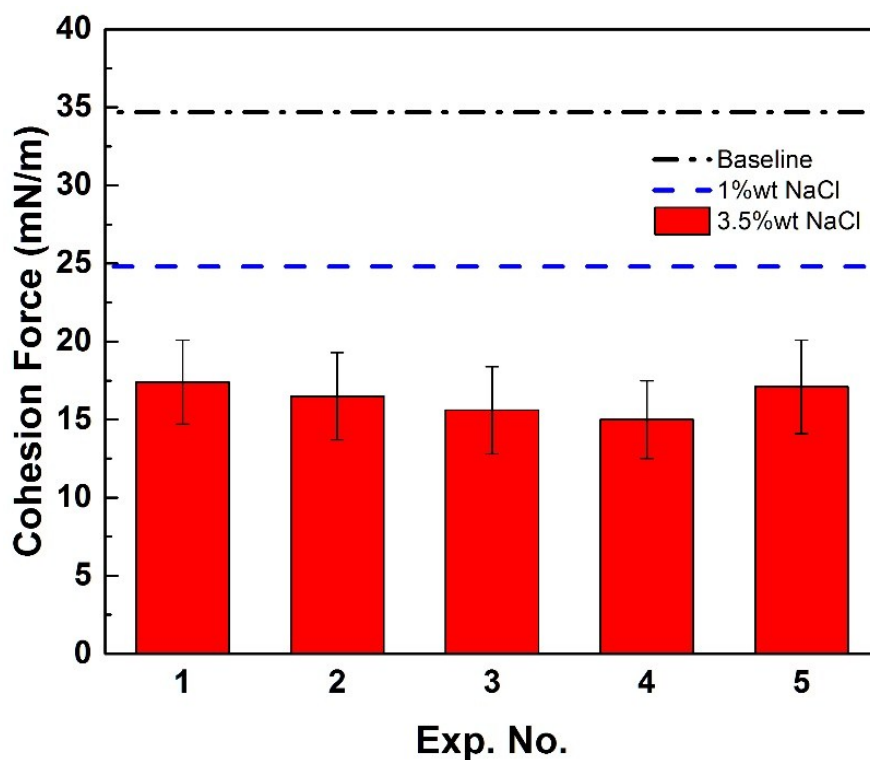

**Figure S3.** Cohesion forces of CH<sub>4</sub>/C<sub>2</sub>H<sub>6</sub> hydrate particles with 3.5 wt.% NaCl. 5 individual experiments in total and each experiment involves at least 40 Individual pull-off repeat experiments.

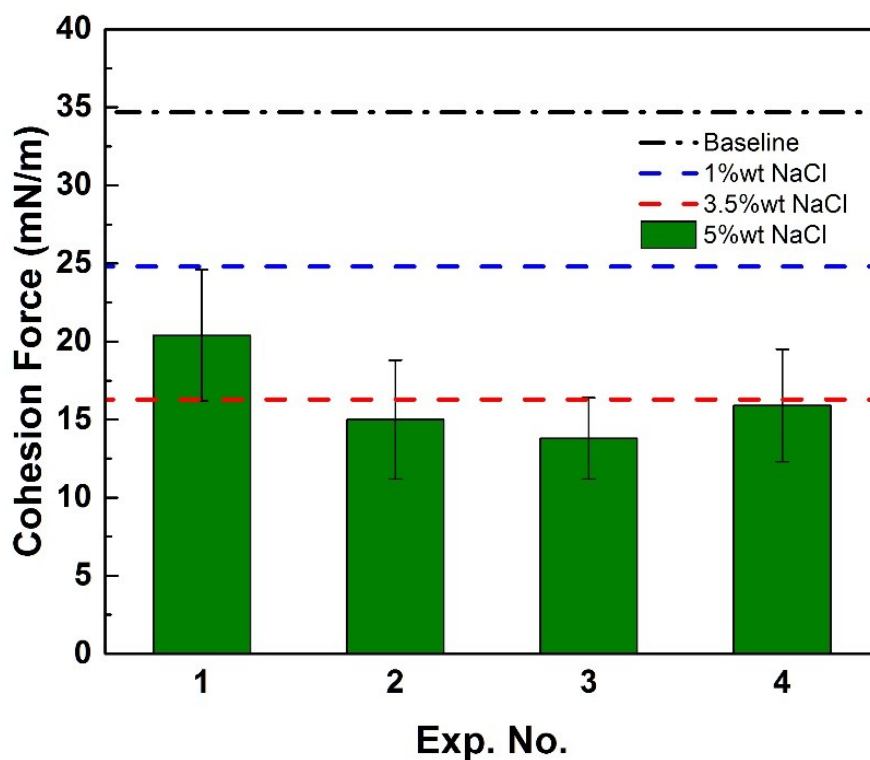

**Figure S4.** Cohesion forces of CH<sub>4</sub>/C<sub>2</sub>H<sub>6</sub> hydrate particles with 5.0 wt.% NaCl. 4 individual experiments in total and each experiment involves at least 40 Individual pull-off repeat experiments.

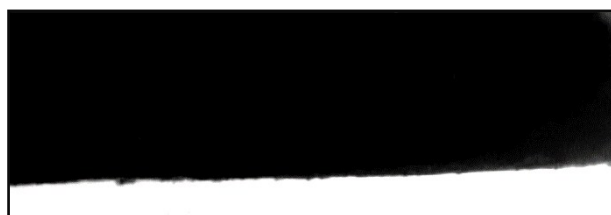

(a) 24 h

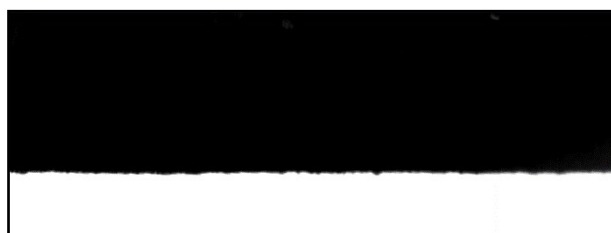

(b) 48 h

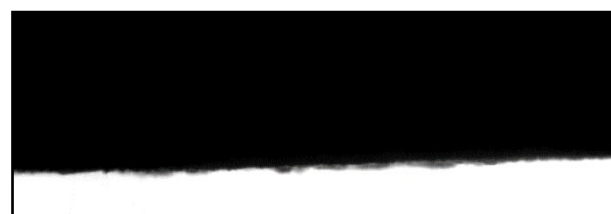

(c) 72 h

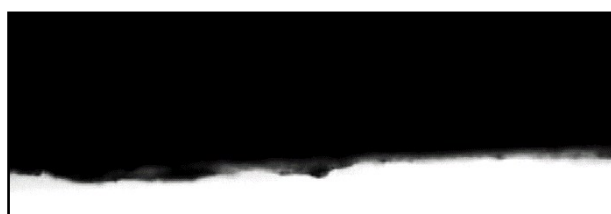

(d) 96 h

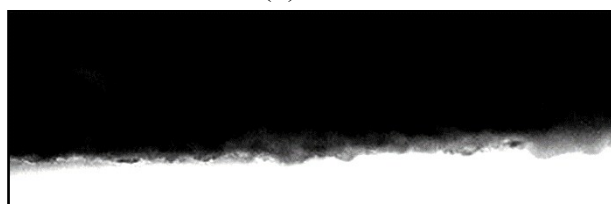

(f) 120 h

**Figure S5.** Hydrate film morphologies on corroded surfaces with different soak time in 5 wt.% NaCl solution
